# Supplementary material for: Retrohoming of a Mobile Group II Intron in Human Cells Suggests How Eukaryotes Limit Group II Intron Proliferation
Source: PubMed Central journal article supplement (PMC4524724; doi:10.1371/journal.pgen.1005422), 2015-08-04

S1 Fig.

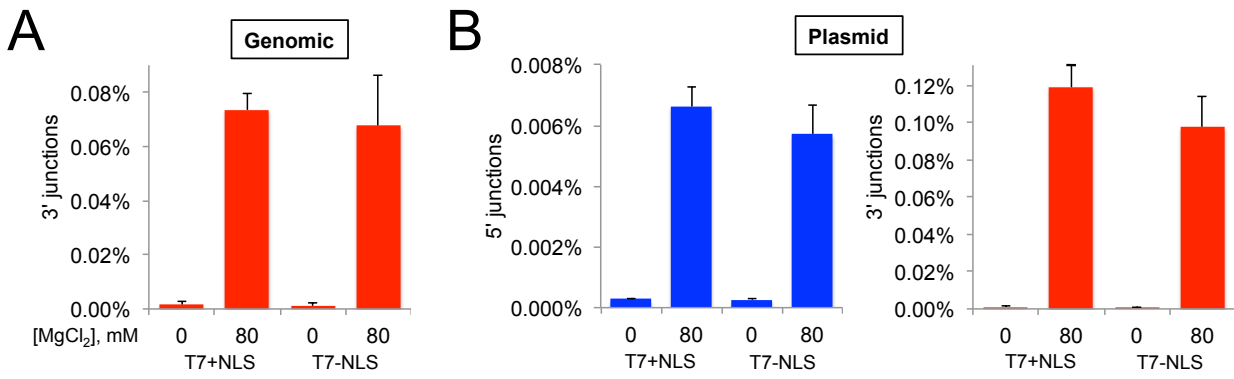

Supplement: pgen.1005422.s001.pdf [file pgen.1005422.s001.pdf]
